# Supplementary material for: Emissions of biogenic volatile organic compounds and subsequent photochemical production of secondary organic aerosol in mesocosm studies of temperate and tropical plant species
Source: Copernicus journal article supplement (doi:10.5194/acp-14-12781-2014), 2014-12-05
Supplement: Supplementary file 1 [file acp-14-12781-2014-supplement.zip]

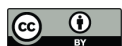

## *Supplement of*

# **Emissions of biogenic volatile organic compounds and subsequent photochemical production of secondary organic aerosol in mesocosm studies of temperate and tropical plant species**

**K. P. Wyche et al.**

*Correspondence to:* A. C. Ryan ([a.ryan@lancaster.ac.uk](mailto:a.ryan@lancaster.ac.uk))

- [acp-14-12781-2014-supplement-cover-letter.pdf](#)
- Wyche et al 2014 Supplimentary
  - .DS\_Store
  - Wyche et al 2014 Revised Manuscript inc TRACK CHANGES
  - Wyche et al 2014 Supplimentary Information.doc
- \_\_MACOSX
  - Wyche et al 2014 Supplimentary
    - \* .\_.DS\_Store
    - \* .\_.Wyche et al 2014 Revised Manuscript inc TRACK CHANGES
    - \* .\_.Wyche et al 2014 Supplimentary Information.doc
